# Supplementary material
Source: PubMed Central journal article supplement (PMC4374602)

**A**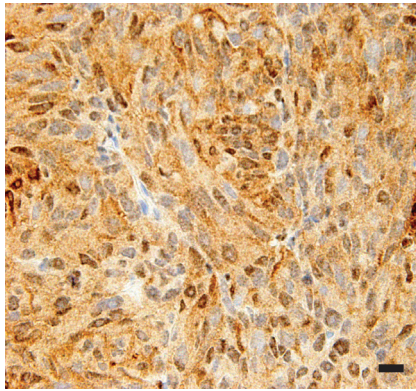**Melanoma**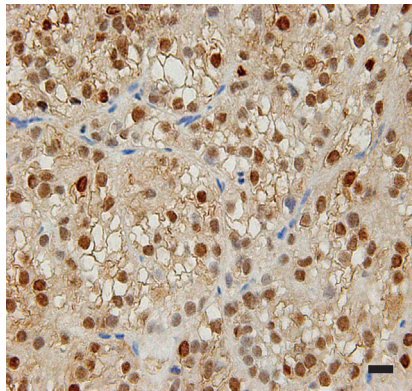**Clear cell renal cell carcinoma**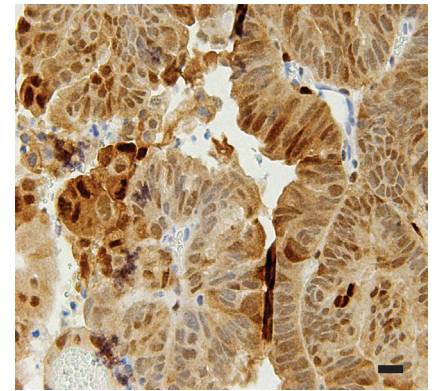**Endometrial carcinoma**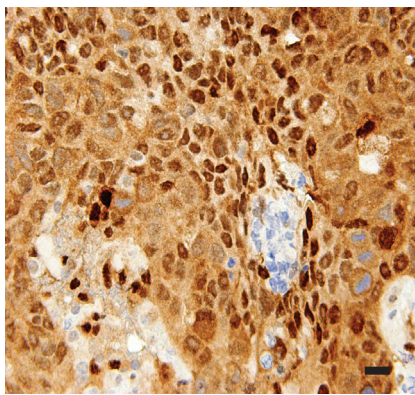**Breast cancer**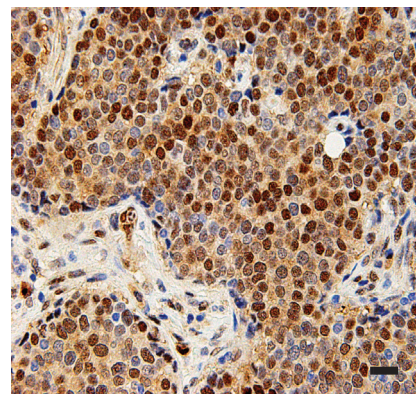**Non-small cell lung cancer****B**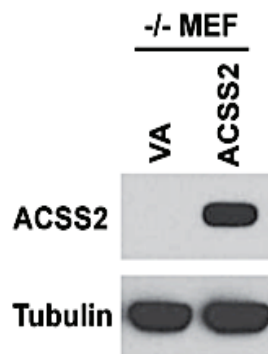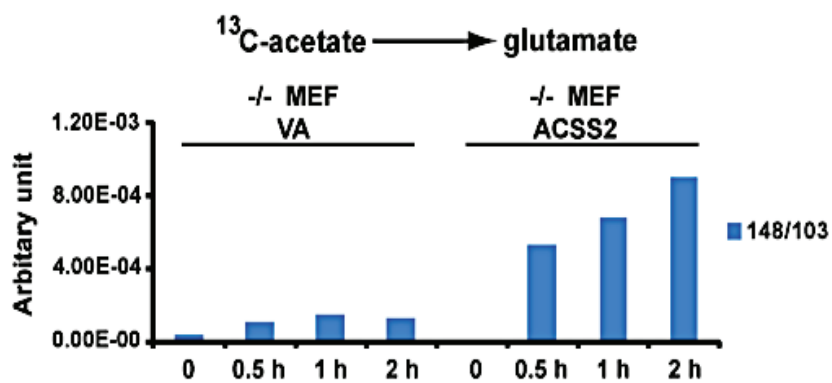

Supplement: NIHMS643849-supplement-1.pdf [file NIHMS643849-supplement-1.pdf]
