# Supplementary material
Source: PubMed Central journal article supplement (PMC4374602)

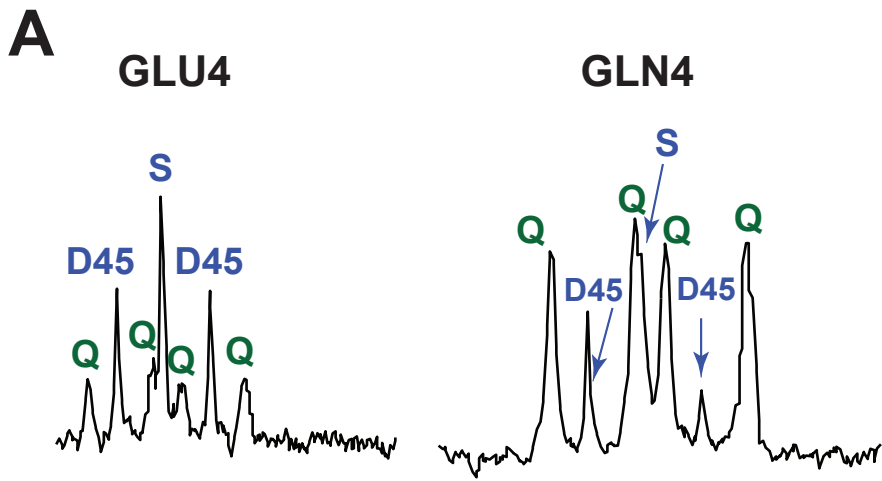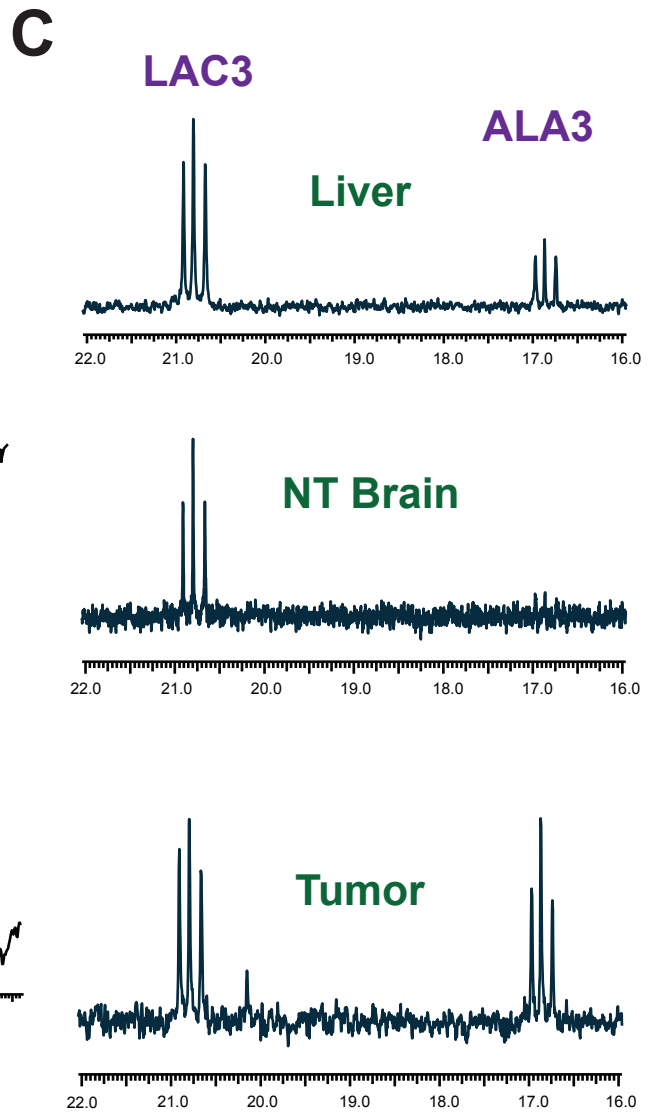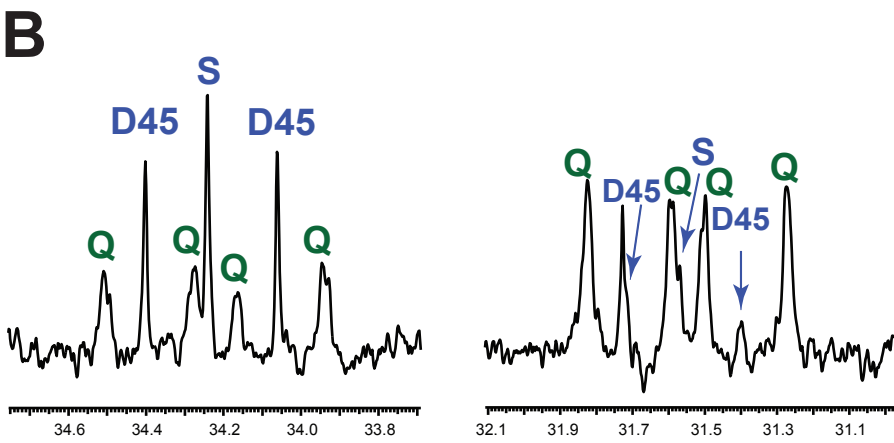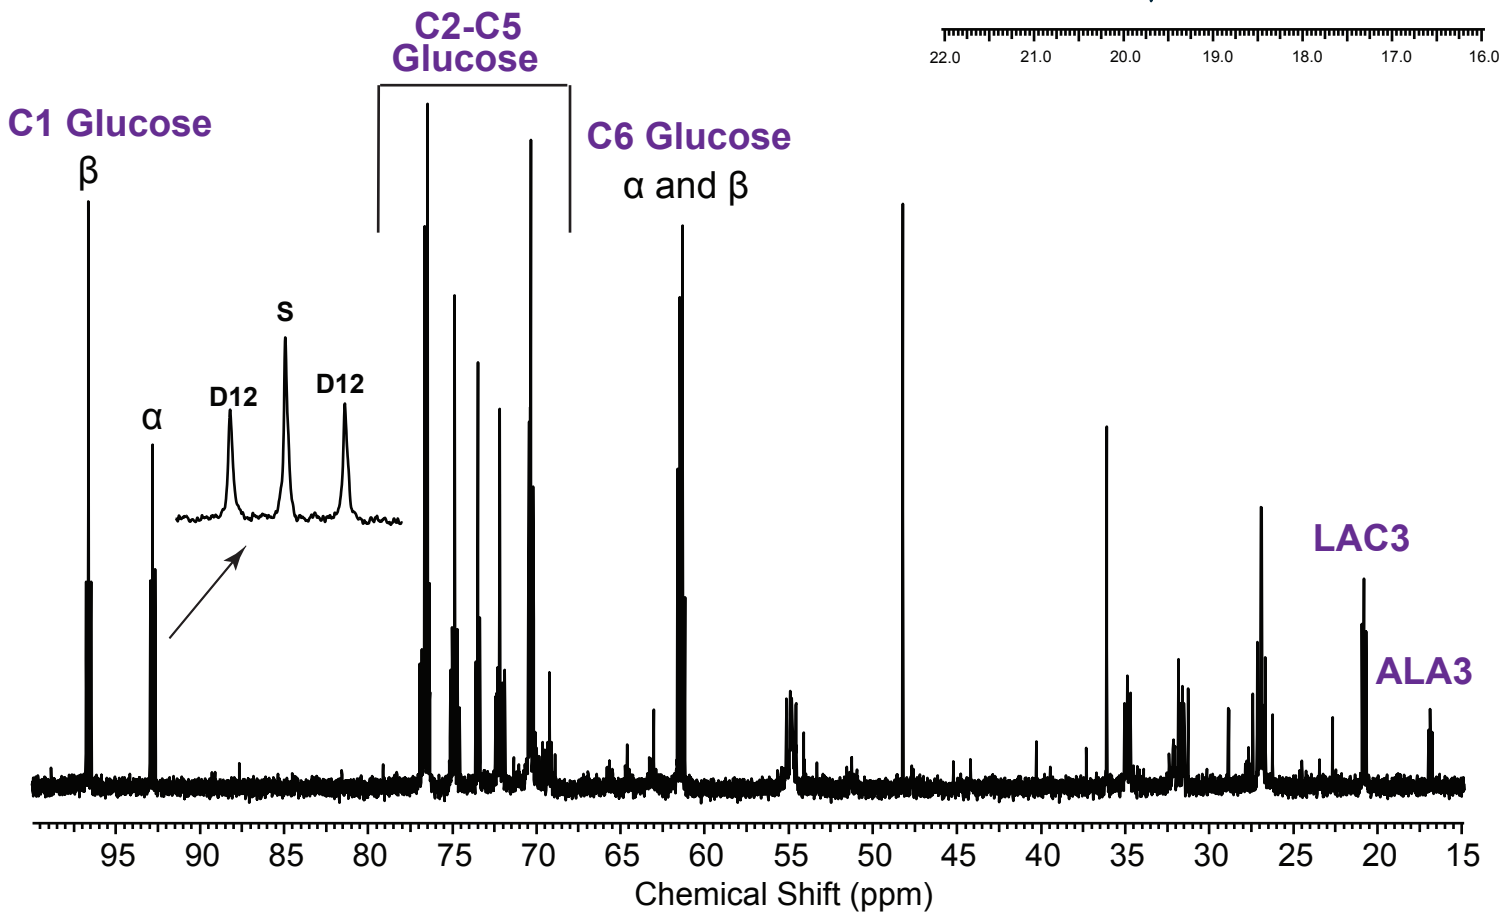

Supplement: NIHMS643849-supplement-3.pdf [file NIHMS643849-supplement-3.pdf]

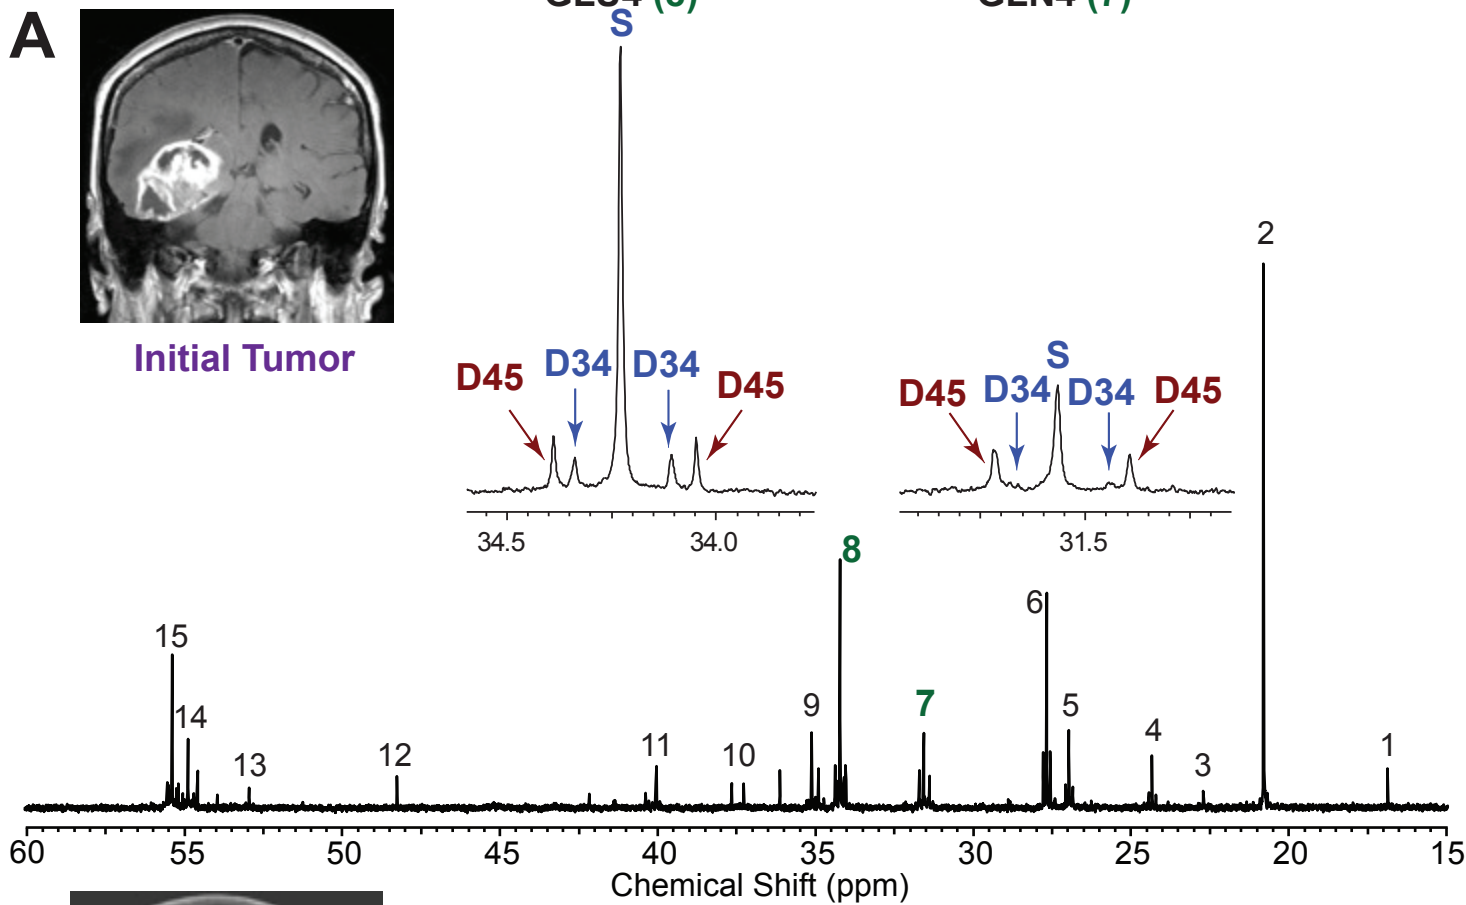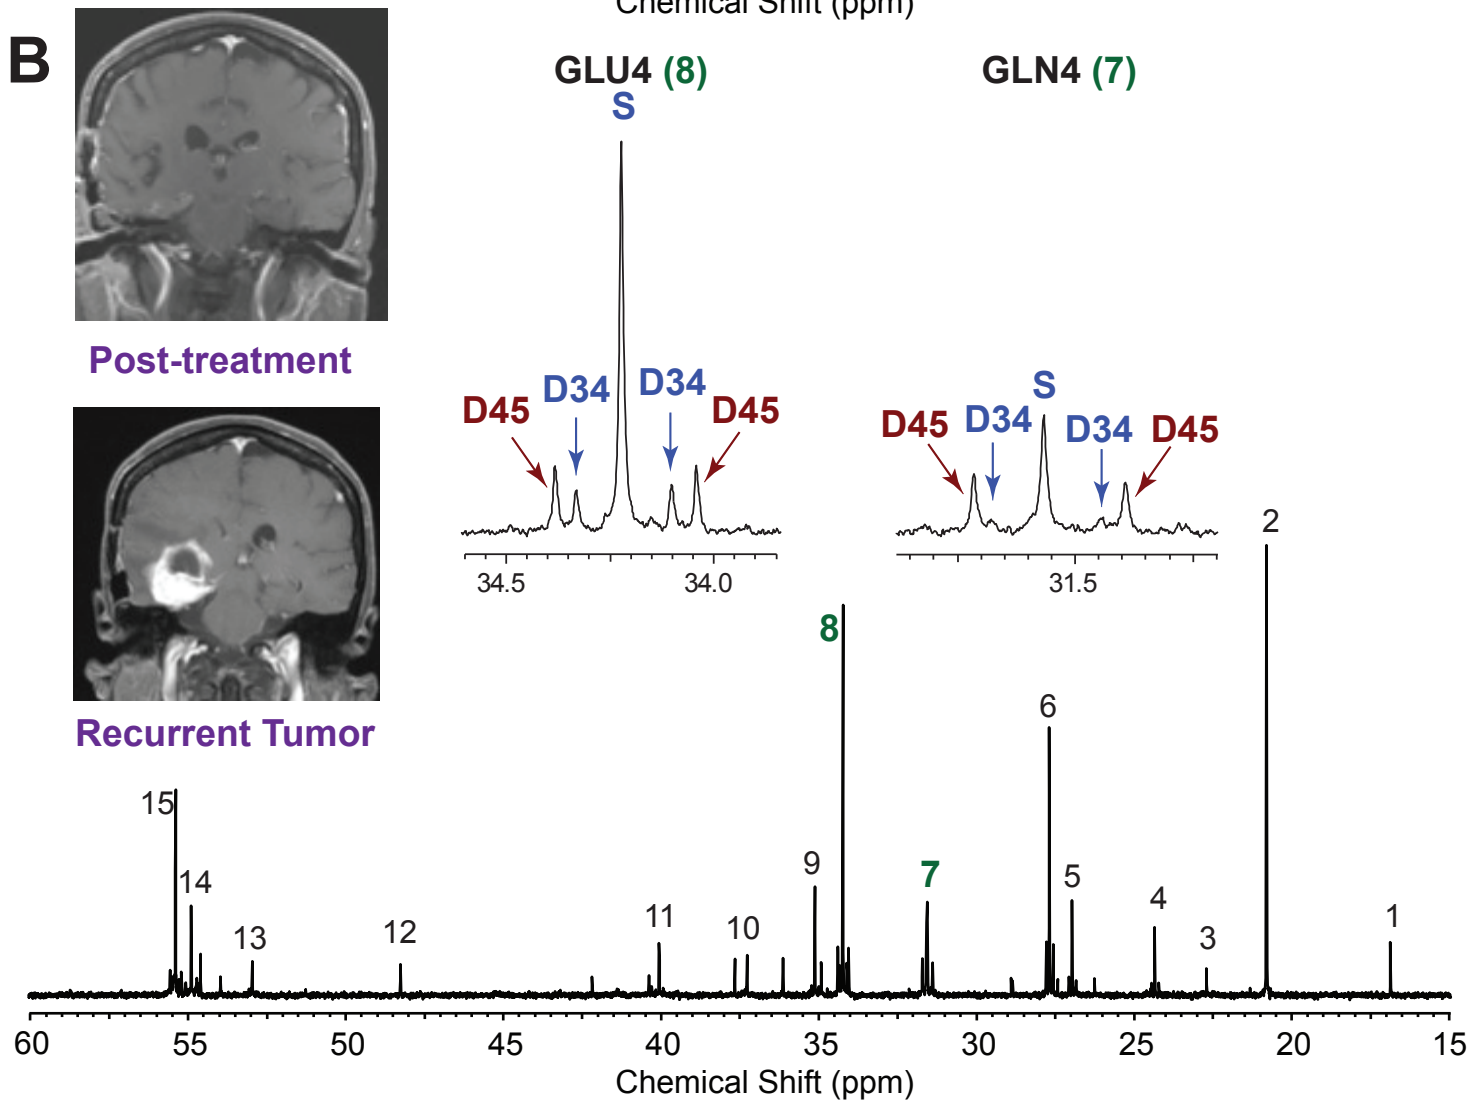

Supplement: NIHMS643849-supplement-5.pdf [file NIHMS643849-supplement-5.pdf]

**A**  
Glioblastoma

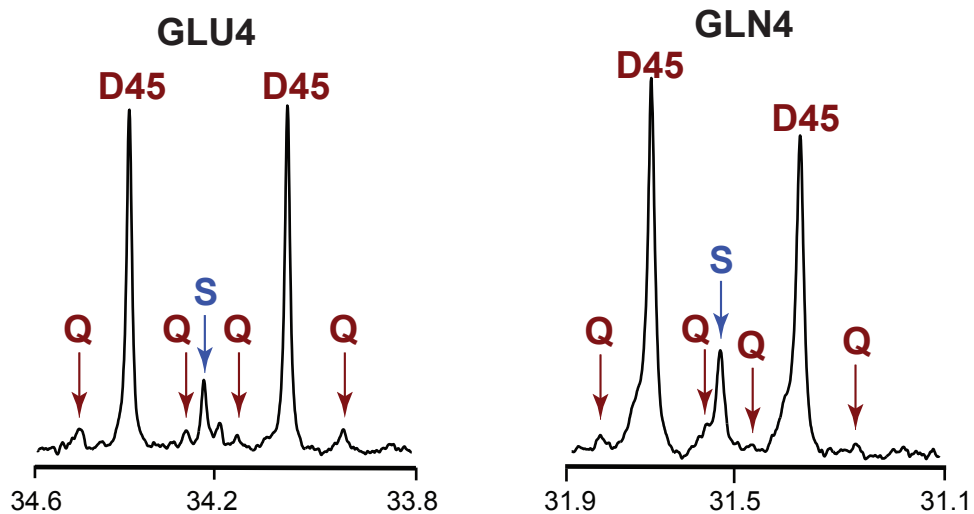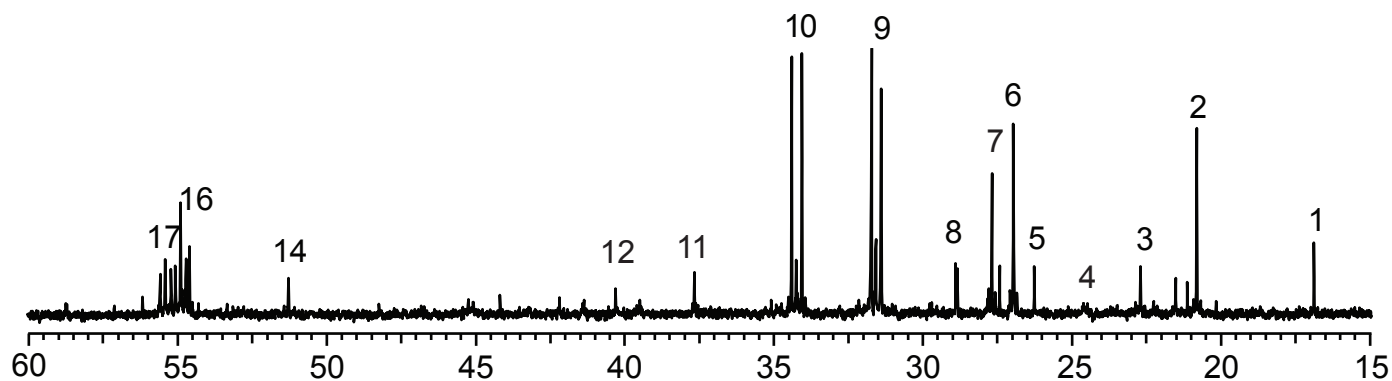

**B**  
Breast cancer  
Brain Metastasis

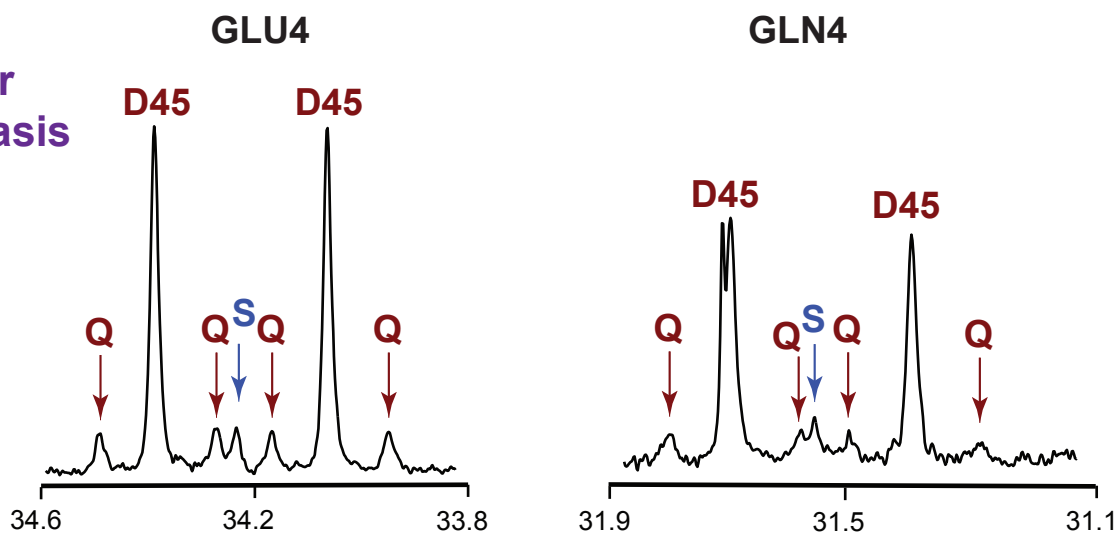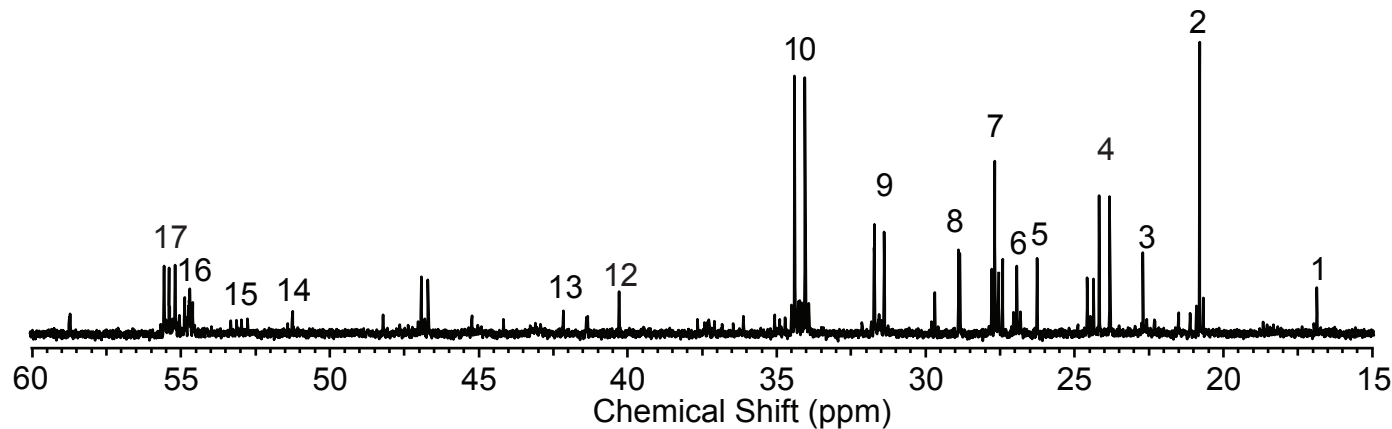

Supplement: NIHMS643849-supplement-6.pdf [file NIHMS643849-supplement-6.pdf]
